# Supplementary material for: Eu3+-activated CaGa2O4 wide band gap (WBG) material for solar blind UV conversion: fluorescence and photo-conductivity performance
Source: Royal Society of Chemistry journal article supplement (doi:10.1039/c4tc00965g), 2014-01-01

## Electronic Supplementary Information

**Eu<sup>3+</sup> activated CaGa<sub>2</sub>O<sub>4</sub> wide band gap (WBG) material for solar blind UV converter:**

**Fluorescence and photo-conductivity performance**

M. Rai<sup>a</sup>, S.K. Singh<sup>b,\*</sup>, K. Mishra<sup>a</sup>, R Shankar<sup>c</sup>, R.K. Srivastava<sup>c</sup>, S.B. Rai<sup>a</sup>

<sup>a</sup>Department of Physics, Banaras Hindu University, Varanasi-221005, INDIA

<sup>b</sup>Department of Physics, Indian Institute of Technology (Banaras Hindu University),  
Varanasi-221005, INDIA

<sup>c</sup>Department of Electronics and Communication, J. K. Institute of Applied Physics and  
Technology, University of Allahabad, Allahabad- 211002, INDIA

*E-mail address:* [sunilcfs1@gmail.com](mailto:sunilcfs1@gmail.com), [sunilks.app@itbhu.ac.in](mailto:sunilks.app@itbhu.ac.in) (S. K. Singh)

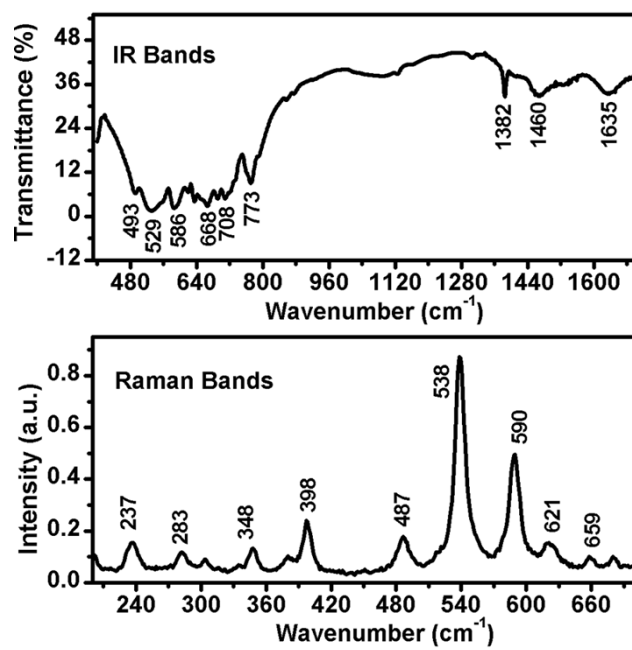

*Fig. S 1(a) Fourier transform infrared, and (b) Raman spectrum of Na<sup>+</sup>, Eu<sup>3+</sup> co-doped*

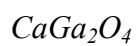

Supplement: c4tc00965g1.pdf [file c4tc00965g1.pdf]
